# Supplementary material for: Identification of Key Factors for Anoxic Survival of B. cenocepacia H111
Source: MDPI journal article supplement (doi:10.3390/ijms23094560), 2022-04-20
Supplement: s1 [file s1]

**Table S1.** List of strains, oligonucleotides and plasmids used in this study

| Strain or plasmid            | Description                                                                                                                                    | Reference                 |
|------------------------------|------------------------------------------------------------------------------------------------------------------------------------------------|---------------------------|
| <u>Strains</u>               |                                                                                                                                                |                           |
| <i>E. coli</i>               |                                                                                                                                                |                           |
| cc118λ-pir                   | Δ(ara-leu) <i>araD</i> Δ <i>lacX74 galE galK phoA20 thi1 rpsE rpoB argE(Am) recA</i> λ pir; Strep <sup>R</sup>                                 | [63]                      |
| Top10                        | Δ <i>lacX74 ara</i> Δ139Δ( <i>ara-leu</i> )                                                                                                    | Invitrogen                |
| SY327 λpir                   | Δ <i>araD</i> , (lac pro) <i>argE(Am) recA56 rif<sup>R</sup> nalA</i> λpir                                                                     | [64]                      |
| <i>B. cenocepacia</i>        |                                                                                                                                                |                           |
| wild-type                    | CF isolate from Germany, genomovar III                                                                                                         | [65,58]                   |
| Δ <i>roxS</i>                | Two-component family of histidine kinase Δ <i>roxS</i> ( <i>I35_RS15825</i> )                                                                  | This study                |
| Δ <i>anr2</i>                | Crp/Fnr family transcriptional regulator Δ <i>anr2</i> ( <i>I35_RS16810</i> )                                                                  | This study                |
| Δ <i>anr1</i>                | Crp/Fnr family transcriptional regulator Δ <i>anr1</i> ( <i>I35_RS23120</i> )                                                                  | This study                |
| Δ <i>cyto</i>                | Cytochrome BD oxidase subunit I Δ <i>cyto</i> ( <i>I35_RS14435</i> )                                                                           | This study                |
| Δ <i>anr1-anr2</i>           | Δ <i>anr1</i> ( <i>I35_RS23120</i> ) deletion and <i>anr2</i> (pSHAFT2:: <i>I35_RS16810</i> ) double mutant, Km <sup>R</sup> , Cm <sup>R</sup> | This study                |
| <i>fliA</i>                  | <i>fliA</i> ( <i>I35_RS00760</i> ) insertional mutant in pSHFAT2                                                                               | This study                |
| <i>fliA</i> <sup>+</sup>     | <i>fliA</i> complemented strain with pBBRMCS-5                                                                                                 | This study                |
| <i>P. aeruginosa</i>         |                                                                                                                                                |                           |
| PA14                         | Wild type, UCBPP-PA14, human isolate                                                                                                           | [66]                      |
| <u>Plasmids</u>              |                                                                                                                                                |                           |
| pRK2013                      | Helper plasmid; Km <sup>R</sup>                                                                                                                | [67]                      |
| pSHAFT2                      | Broad-host-range suicide plasmid, mobilisable for conjugation; Cm <sup>R</sup>                                                                 | [68]                      |
| pBBR1MCS-5                   | Broad host-range cloning vector; Gm <sup>R</sup>                                                                                               | [69]                      |
| pDAI-SceI                    | Suicide plasmid with oriR6K, mob <sup>+</sup> , I-SceI restriction site, Tm <sup>R</sup>                                                       | [61]                      |
| pDONR221                     | Km <sup>R</sup> , Cm <sup>R</sup> , attP sites, ccdB, pUC origin                                                                               | Invitrogen                |
| pGPI-SceI                    | Suicide plasmid with oriR6K, mob <sup>+</sup> , I-SceI restriction site, Tm <sup>R</sup>                                                       | Steiner unpublished, [61] |
| pAUC40                       | Cm <sup>R</sup> , Strep <sup>R</sup> attR sites, R6K origin, sacB, ccdB                                                                        | [70]                      |
| pBBR5::FLP                   | Gm <sup>R</sup> , sacB                                                                                                                         | [71]                      |
| pKD4                         | Km <sup>R</sup>                                                                                                                                | [72]                      |
| pGEM T easy vector           | PCR cloning                                                                                                                                    | Promega                   |
| pGPI-SceI_Δ <i>anr2</i> updw | pGPI-SceI containing the upstream (654 bp) and downstream (560 bp) regions of the <i>anr2</i> ( <i>I35_RS16810</i> ), Tm <sup>R</sup>          | This study                |
| pGPI-SceI_Δ <i>cydA</i> updw | pGPI-SceI containing the upstream (647 bp) and downstream (615 bp) regions of the <i>cydA</i> ( <i>I35_RS14435</i> ), Tm <sup>R</sup>          | This study                |
| pGPI-SceI_Δ <i>roxS</i> updw | pGPI-SceI containing the upstream (581 bp) and downstream (505 bp) regions of the <i>roxS</i> ( <i>I35_RS15825</i> ), Tm <sup>R</sup>          | This study                |
| pAUC40_Δ <i>anr1</i> updw    | pAUC40 containing upstream (466 bp) and downstream (495 bp) regions of <i>anr1</i> ( <i>I35_RS23120</i> ), Cm <sup>R</sup>                     | This study                |

|                                     |                                                                                              |            |
|-------------------------------------|----------------------------------------------------------------------------------------------|------------|
| pSHAFT2_ <i>anr</i> <sub>2</sub>    | pSHAFT2 containing a 259 bp region of <i>anr</i> <sub>2</sub> (I35_RS16810), Cm <sup>R</sup> | This study |
| pSHAFT2_ <i>fliA</i>                | pSHAFT2 containing a 238 bp region of <i>fliA</i> (I35_RS00760), Cm <sup>R</sup>             | This study |
| pBBR1MSC-5_ <i>fliA</i>             | pBBR1MSC-5 containing the entire <i>fliA</i> gene (I35_RS00760) (749 bp), Gm <sup>R</sup>    | This study |
| <u>Oligonucleotides</u>             |                                                                                              |            |
| roxSup_Fw_KpnI_                     | tccggtaccCCGAGCAGTTTACCCGTTTA                                                                | This study |
| roxSup_Rv_XbaI                      | tcctctagaAACAGGCCGAATTGTACAGG                                                                | This study |
| roxSdw_Fw_EcoRI                     | tccgaattcGTCGCCGAGATGTTGTTGTT                                                                | This study |
| roxSdw_Rv_KpnI                      | tccggtaccGGCCTCAACCAACACGTAGA                                                                | This study |
| <i>anr</i> <sub>2</sub> up_Fw_KpnI  | tccggtaccGATCGTATACTCCGGCGTTG                                                                | This study |
| <i>anr</i> <sub>2</sub> up_Rv_XbaI  | tcctctagaTACTCTGCCTCGCAGCATC                                                                 | This study |
| <i>anr</i> <sub>2</sub> dw_Rv_KpnI  | tccggtaccTGCAACACCTCTGATACCGC                                                                | This study |
| <i>anr</i> <sub>2</sub> dw_Fw_EcoRI | tccgaattcTCGACGATCAGGATTACACG                                                                | This study |
| <i>cydA</i> _Rv_up_NdeI             | tcccatatgGCTACTTATCATGGTGGTCT                                                                | This study |
| <i>cydA</i> _Fw_up_XbaI             | tcctctagaCGA ATA CGC GTA AAT CGC G                                                           | This study |
| <i>cydA</i> _Fw_dw_NdeI             | tcccatatgTGAGTACGCCCTCGCAAC                                                                  | This study |
| <i>cydA</i> _Rv_dw_EcoRI            | tccgaattcACG CCG TCG GTC TTC ATC                                                             | This study |
| <i>fliA</i> _Fw_EcoRI               | tccgaattcGACGAATACCAGGGGATGC                                                                 | This study |
| <i>fliA</i> _Rv_XbaI                | tcctctagaGCAGATTCAGACCCCGTTC                                                                 | This study |
| <i>fliA</i> _comp_Rv_XbaI           | tcctctagaTCGACAAGGGGTCAGGACT                                                                 | This study |
| <i>fliA</i> _comp_Fw_EcoRI          | tccgaattcGCCATGATGTACAACGCTCA                                                                | This study |
| pSHAFT_Fw                           | CTTCAGCTGATGTGTGATAACATACT                                                                   | [73]       |
| <i>anr</i> <sub>2</sub> _IM_F       | GCCTCGAGTCGGTCATCTG                                                                          | This study |
| <i>anr</i> <sub>2</sub> _IM_R       | agatctCTGTACGGAATCACGCAGAC                                                                   | This study |
| <i>anr</i> <sub>2</sub> _Comp_F     | tccaagcttGGTGGGACAATGATTTTCGTC                                                               | This study |
| <i>anr</i> <sub>2</sub> _Comp_R     | tcctctagaGTGCGGTATCAGAGGTGTTG                                                                | This study |
| <i>anr</i> <sub>1</sub> _up_F       | CAATTTTCGGCGGCGCAACAC                                                                        | This study |
| <i>anr</i> <sub>1</sub> _up_R       | TGGCGGTGGACATGAGTCG                                                                          | This study |
| <i>anr</i> <sub>1</sub> _dw_F       | ATCATCGACGCGCAAGCGCT                                                                         | This study |
| <i>anr</i> <sub>1</sub> _dw_R       | AAACACGTGCCGCCTCCATC                                                                         | This study |
| pKD4fwd-2                           | TAGGCTGGAGCTGCTTCGAAGTTC                                                                     | This study |
| pKD4rev-2                           | CATATGAATATCCTCCTTAGTTCCTATTCCG                                                              | This study |
| GWattB1                             | GGGGACAAGTTTGTACAAAAAGCAGGCT                                                                 | [74]       |
| GWattB2                             | GGGGACCACTTTGTACAAGAAAGCTGGGT                                                                | [74]       |
| PAIR_ADAPT_6BC##_HI                 | ACACTCTTCCCTACACGACGCTCTTCCGATCTBBB                                                          | [59]       |
| PAIR_ADAPT_6BC##_LO_5PH             | BBBT                                                                                         | [59]       |
| T23_PAIR_COLLECT                    | BBBBBBAGATCGGAAGAGCGGTTCAGCAGGAATGC                                                          | [59]       |
| T23_SLXA_PAIR_Amp                   | CGAG                                                                                         | [59]       |
| SLXA_PAIR_REV_AMP                   | CTTCGGCGCGCCCTAGGGGGATCCTCGGCATTCC                                                           | [59]       |
| T23_SEQ_G (Fw)                      | TGCTGAACCGCTCTTCCGATCT                                                                       | [59]       |
| T23_INDEX_1 (Index)                 | GGAACCTTCGGAATAGGAACTTCTTAGATGTGTATAA                                                        | [59]       |
| PE_READ2_SEQ (Rv)                   | GA G                                                                                         | [59]       |
|                                     | CAAGCAGAAGACGGCATAACGAGATCGGTCTCGGC                                                          | [59]       |
|                                     | ATTC CTGCTGAACCGCTCTTCCGATCT                                                                 | [59]       |
|                                     | ATTAGGAACTTCGGAATAGGAACTTCTTAGATGTGT                                                         | [59]       |
|                                     | ATAAGAGACAG                                                                                  | [21]       |
|                                     | CTAGAGAATAGGAACTTCGGAATAGGAACTTCTTA                                                          | [59]       |
|                                     | GATGTGTATAAG                                                                                 | [59]       |
|                                     | CGGTCTCGGCATTCTGCTGAACCGCTCTTCCGAT                                                           | [59]       |
|                                     | CT                                                                                           | [59]       |

## Reference

21. Vitale, A.; Paszti, S.; Takahashi, K.; Toyofuku, M.; Pessi, G.; Eberl, L. Mapping of the denitrification pathway in *Burkholderia thailandensis* by genome-wide mutant profiling. *J. Bacteriol.* **2020**, *202*. e00304-20. <https://doi.org/10.1128/JB.00304-20>.
58. Gotschlich, A.; Huber, B.; Geisenberger, O.; Togl, A.; Steidle, A.; Riedel, K.; Hill, P.; Tümmler, B.; Vandamme, P.; Middleton, B.; et al. Synthesis of multiple N-acylhomoserine lactones is wide-spread among the members of the *Burkholderia cepacia* complex. *Syst. Appl. Microbiol.* **2001**, *24*, 1–14. <https://doi.org/10.1078/0723-2020-00013>.
59. Gallagher, L.A.; Ramage, E.; Patrapuvich, R.; Weiss, E.; Brittnacher, M.; Manoil, C. Sequence-defined transposon mutant library of *Burkholderia thailandensis*. *MBio* **2013**, *4*, 1–7. <https://doi.org/10.1128/mBio.00604-13>.
61. Flannagan, R. Linn, T. V.M. A system for the construction of targeted unmarked gene deletions in the genus *Burkholderia*. *Environ. Microbiol.* **2008**, *10*, 1652–1660. <https://doi.org/10.1111/j.1462-2920.2008.01576.x>.
63. Herrero, M., V de Lorenzo, Timmis, K. Transposon vectors containing non-antibiotic resistance selection markers for cloning and stable chromosomal insertion of foreign genes in Gram-negative bacteria. *J Bacteriol*, **1990**, *172*, 6557-6567. <https://doi.org/10.1128/jb.172.11.6557-6567.1990>.
64. Miller, V.L., Mekalanos, J.J. A novel suicide vector and its use in construction of insertion mutations: osmoregulation of outer membrane proteins and virulence determinants in *Vibrio cholerae* requires toxR. *Journal of bacteriology*, **1998**, *170*(6), pp.2575-2583. <https://doi.org/10.1128/jb.170.6.2575-2583.1988>.
65. Römling, U., Wingender, J., Müller, H. and Tümmler, B. A major *Pseudomonas aeruginosa* clone common to patients and aquatic habitats. *Applied and Environmental Microbiology*, **1994**, *60*(6), pp.1734-1738. <https://doi.org/10.1128/aem.60.6.1734-1738.1994>.
66. Rahme, L.G., Stevens, E.J., Wolford, S.F., Shao, J., Tompkins, R.G. and Ausubel, F.M. Common virulence factors for bacterial pathogenicity in plants and animals. *Science*, **1995**, *268*(5219), pp.1899-1902. <https://doi.org/10.1126/science.7604262>.
67. Phadnis, S.H., Berg, D.E. Identification of base pairs in the outside end of insertion sequence IS50 that are needed for IS50 and Tn5 transposition. *Proceedings of the National Academy of Sciences*, **1987**, *84*(24), pp.9118-9122. <https://doi.org/10.1073/pnas.84.24.9118>.
68. Shastri, S., Spiewak, H.L., Sofoluwe, A., Eidsvaag, V.A., Asghar, A.H., Pereira, T., Bull, E.H., Butt, A.T., Thomas, M.S., . An efficient system for the generation of marked genetic mutants in members of the genus *Burkholderia*. *Plasmid*, **2017**, *89*, pp.49-56. <https://doi.org/10.1016/j.plasmid.2016.11.002>.
69. Kovach, M.E., Elzer, P.H., Hill, D.S., Robertson, G.T., Farris, M.A., Roop II, R.M., Peterson, K.M. Four new derivatives of the broad-host-range cloning vector pBBR1MCS, carrying different antibiotic-resistance cassettes. *Gene* **1995**, *166*(1), pp.175-176. [https://doi.org/10.1016/0378-1119\(95\)00584-1](https://doi.org/10.1016/0378-1119(95)00584-1).
70. Carlier, A., Burbank, L. and von Bodman, S.B. Identification and characterization of three novel EsaI/EsaR quorum-sensing controlled stewartan exopolysaccharide biosynthetic genes in *Pantoea stewartii* ssp. *stewartii*. *Molecular microbiology*, **2009**, *74*(4), pp.903-913.
71. Agnoli, K., Schwager, S., Uehlinger, S., Vergunst, A., Viteri, D. F., Nguyen, D. T., Sokol, P.A., Carlier, A., Eberl, L. Exposing the third chromosome of *Burkholderia cepacia* complex strains as a virulence plasmid. *Molecular microbiology*, **2012**, *83*(2), 362-378. <http://doi.org/10.1111/j.1365-2958.2011.07937.x>.
72. Wanner, B. L., Datsenko, K. A. One-step inactivation of chromosomal genes in *Escherichia coli* K-12 using PCR products. *P Natl Acad Sci Usa*, **2000**, *97*(12), 6640-6645. <http://doi.org/10.1073/pnas.120163297>.
73. Lardi, M., Liu, Y., Purtschert, G., Bolzan de Campos, S., Pessi, G. Transcriptome analysis of *Paraburkholderia phymatum* under nitrogen starvation and during symbiosis with *Phaseolus vulgaris*. *Genes*, **2017**, *8*(12), 389. <http://doi.org/10.3390/genes8120389>
74. Choi, K. H., Schweizer, H. P. An improved method for rapid generation of unmarked *Pseudomonas aeruginosa* deletion mutants. *BMC microbiology*, **2005**, *5*(1), 1-11. <http://doi.org/10.1186/1471-2180-5-30>.
