# Supplementary material for: Identification of Key Factors for Anoxic Survival of B. cenocepacia H111
Source: Int J Mol Sci. 2022 Apr 20;23(9):4560. doi: 10.3390/ijms23094560 (PMC9104464; doi:10.3390/ijms23094560)
Supplement: Supplementary file 1 [file ijms-23-04560-s001.zip]

Archive with 6 entries (6 files):
- ijms-1648933-Supplementary Material Explanation.pdf
- Paszti et al_Supplemental Figure S1.tif
- Paszti et al_Supplemental Figure S2.tif
- Paszti et al_Supplemental Figure S3.png
- S1 Table Strains, oligos, plasmids.pdf
- S2 and S3 Table of fitness determinants in ABC and ABC with nitrate in anoxic condition.xlsx
