# Supplementary material for: Identification of Key Factors for Anoxic Survival of B. cenocepacia H111
Source: Int J Mol Sci. 2022 Apr 20;23(9):4560. doi: 10.3390/ijms23094560 (PMC9104464; doi:10.3390/ijms23094560)
Supplement: Supplementary file 1 [file ijms-23-04560-s001.zip › S2 and S3 Table of fitness determinants in ABC and ABC with nitrate in anoxic condition.xlsx]

## Sheet: Table S2
								61 potential fitness determinants found for the anoxic survival of B. cenocepacia H111 in ABC . Orthologs in B. cenocepacia J3215 are shown. AE = aerobic, AN = anoxia, UIC = unqiue insertion counts, UID = unqiue insertion density, nUID = normalized unqiue insertion density, FC = fold change
Locus_tag	Orthologue	Gene_symbol	Description	UIC_AE	UIC_AN_ABC	UIC_AN_ABC+NO3	UID_AE	UID_AN_ABC	UID_AN_ABC+NO3	nUID_AE	nUID_AN_ABC	nUID_AN_ABC+NO3	FC_AN_ABC	FC_AN_ABC+NO3	COG
I35_RS02595	BCAL3376	#N/A	4-hydroxy-tetrahydrodipicolinate reductase	128	22	50	0.160401	0.0275689	0.0626566	0.0144923	0.00279167	0.00744258	-2.37609	-0.961416	E
I35_RS02690	BCAL3357	#N/A	glutamate/aspartate ABC transporter permease GltJ	152	64	63	0.205128	0.0863698	0.0850202	0.0185335	0.00874594	0.010099	-1.08345	-0.87592	E
I35_RS02700	BCAL3354	artP	arginine ABC transporter ATP-binding protein	149	36	55	0.205234	0.0495868	0.0757576	0.0185431	0.00502124	0.00899876	-1.88476	-1.04308	E
I35_RS14250	BCAL0823	purU	formyltetrahydrofolate deformylase	150	54	80	0.169492	0.0610169	0.0903955	0.0153137	0.00617868	0.0107375	-1.30945	-0.512163	F
I35_RS14265	BCAL0820	#N/A	adenine phosphoribosyltransferase	149	33	28	0.262787	0.0582011	0.0493827	0.023743	0.00589353	0.00586586	-2.0103	-2.01709	F
I35_RS01620	BCAL0322	#N/A	hydrolase	99	39	55	0.270492	0.106557	0.150273	0.0244391	0.0107902	0.01785	-1.17948	-0.453269	F, G
I35_RS04855	No orthologue	#N/A	nicotinate phosphoribosyltransferase	225	9	33	0.1875	0.0075	0.0275	0.0169408	0.000759462	0.00326655	-4.47938	-2.37466	H
I35_RS07330	BCAL1622	#N/A	transporter	34	11	20	0.157407	0.0509259	0.0925926	0.0142219	0.00515684	0.0109985	-1.46355	-0.370807	H
I35_RS08870	BCAL1859	#N/A	deaminase	102	40	65	0.191011	0.0749064	0.121723	0.017258	0.00758514	0.0144587	-1.18602	-0.25533	H
I35_RS15025	BCAL0661	#N/A	hypothetical protein	40	4	17	0.164609	0.0164609	0.0699588	0.0148725	0.00166686	0.00830996	-3.15745	-0.839738	I
I35_RS01950	BCAL0387	ychF	GTP-binding protein	182	50	55	0.16621	0.0456621	0.0502283	0.0150172	0.00462382	0.0059663	-1.69946	-1.33171	J
I35_RS06995	BCAL1509	truB	tRNA pseudouridine synthase B	151	36	38	0.161844	0.0385852	0.0407288	0.0146227	0.0039072	0.00483792	-1.904	-1.59575	J
I35_RS07685	BCAL1625	#N/A	tRNA-dihydrouridine synthase A	159	41	70	0.161094	0.04154	0.070922	0.014555	0.00420641	0.00842437	-1.79085	-0.788872	J
I35_RS12885	BCAL2715	rpmG	50S ribosomal protein L33	21	2	7	0.125	0.0119048	0.0416667	0.0112938	0.0012055	0.00494932	-3.22784	-1.19023	J
I35_RS00665	BCAL0125	#N/A	transcriptional regulator	141	52	53	0.254054	0.0936937	0.0954955	0.022954	0.00948758	0.0113433	-1.27463	-1.0169	K
I35_RS00760	BCAL0144	#N/A	DNA-directed RNA polymerase sigma-70 factor	139	38	42	0.189116	0.0517007	0.0571429	0.0170867	0.00523529	0.00678763	-1.70653	-1.3319	K
I35_RS01850	BCAL0368	#N/A	cold-shock protein	63	15	31	0.308824	0.0735294	0.151961	0.0279024	0.00744571	0.0180505	-1.90591	-0.628356	K
I35_RS13950	BCAL0883	#N/A	TetR family transcriptional regulator	191	73	53	0.318333	0.121667	0.0883333	0.0287616	0.0123202	0.0104926	-1.22312	-1.45478	K
I35_RS16810	BCAM0049	#N/A	Crp/Fnr family transcriptional regulator	134	48	14	0.179384	0.064257	0.0187416	0.0162075	0.00650677	0.0022262	-1.31665	-2.86401	K
I35_RS17480	No orthologue	#N/A	AraC family transcriptional regulator	52	19	24	0.219409	0.0801688	0.101266	0.0198238	0.00811802	0.0120287	-1.28803	-0.72075	K
I35_RS28070	BCAM2434	#N/A	YsiA protein	104	13	20	0.143845	0.0179806	0.0276625	0.0129965	0.00182075	0.00328585	-2.83552	-1.98378	K
I35_RS05065	No orthologue	#N/A	excinuclease ABC subunit C	394	130	158	0.193422	0.0638193	0.077565	0.0174758	0.00646245	0.00921346	-1.4352	-0.923543	L
I35_RS12560	BCAL2648	#N/A	membrane protein	296	72	104	0.163085	0.0396694	0.0573003	0.0147349	0.00401699	0.00680633	-1.87505	-1.11429	M
I35_RS00610	BCAL0114	#N/A	flagellin	561	126	279	0.484456	0.108808	0.240933	0.0437709	0.0110181	0.0286188	-1.9901	-0.613008	N
I35_RS00670	BCAL0126	#N/A	flagellar motor protein MotA	293	123	127	0.340302	0.142857	0.147503	0.0307465	0.0144659	0.0175209	-1.08776	-0.811344	N
I35_RS00675	BCAL0127	#N/A	flagellar motor protein MotB	348	62	131	0.341176	0.0607843	0.128431	0.0308255	0.00615512	0.0152555	-2.32427	-1.01479	N
I35_RS15440	BCAL0577	flgL	flagellar hook-associated protein FlgL	316	27	122	0.255663	0.0218447	0.0987055	0.0230994	0.00221203	0.0117246	-3.38441	-0.978316	N
I35_RS15445	BCAL0576	flgK	flagellar hook protein FlgK	537	100	180	0.27795	0.0517598	0.0931677	0.025113	0.00524128	0.0110668	-2.26044	-1.1822	N
I35_RS15460	BCAL0571	#N/A	flagellar P-ring protein FlgI	167	18	75	0.140928	0.0151899	0.0632911	0.012733	0.00153815	0.00751795	-3.0493	-0.760158	N
I35_RS15470	BCAL0569	flgG	flagellar basal body rod protein FlgG	131	25	39	0.166033	0.0316857	0.0494297	0.0150012	0.00320854	0.00587143	-2.22509	-1.35329	N
I35_RS15480	BCAL0567	flgE	flagellar hook protein FlgE	159	26	68	0.128019	0.020934	0.0547504	0.0115666	0.00211981	0.00650345	-2.44796	-0.830692	N
I35_RS15695	BCAL0524	fliG	flagellar motor switch protein FliG	225	66	93	0.225904	0.0662651	0.0933735	0.0204106	0.00671011	0.0110912	-1.60491	-0.879895	N
I35_RS16415	BCAL3503	fliP	flagellar biosynthesis protein FliP	150	17	70	0.19685	0.0223097	0.0918635	0.0177856	0.00225912	0.0109119	-2.97688	-0.704808	N
I35_RS16430	BCAL3506	fliM	flagellar motor switch protein FliM	262	113	126	0.262262	0.113113	0.126126	0.0236956	0.011454	0.0149817	-1.04876	-0.661415	N
I35_RS15810	BCAL0501	#N/A	ATP-dependent protease subunit HslV	99	36	67	0.184358	0.0670391	0.124767	0.0166568	0.00678849	0.0148203	-1.29495	-0.16854	O
I35_RS02685	BCAL3358	#N/A	ABC transporter	292	97	102	0.326622	0.108501	0.114094	0.0295105	0.010987	0.0135525	-1.42543	-1.12267	P
I35_RS00360	No orthologue	#N/A	AbrB family transcriptional regulator	39	13	16	0.164557	0.0548523	0.0675105	0.0148678	0.00555443	0.00801915	-1.42048	-0.890675	S
I35_RS00565	No orthologue	#N/A	type 12 methyltransferase	118	40	65	0.161202	0.0546448	0.0887978	0.0145647	0.00553342	0.0105477	-1.39624	-0.465548	S
I35_RS02485	BCAL3398	#N/A	competence damage-inducible protein A	158	31	47	0.315369	0.0618762	0.0938124	0.0284938	0.00626569	0.0111434	-2.18511	-1.35446	S
I35_RS03045	BCAL3281	tldD	peptidase C69	325	98	138	0.221541	0.066803	0.0940695	0.0200163	0.00676458	0.0111739	-1.56511	-0.841044	S
I35_RS04835	BCAL2900	#N/A	protein CreA	81	29	57	0.166667	0.0596708	0.117284	0.0150585	0.00604236	0.0139314	-1.31739	-0.112232	S
I35_RS06795	BCAL1470	#N/A	thioesterase	96	35	64	0.237037	0.0864198	0.158025	0.0214165	0.008751	0.0187707	-1.2912	-0.190235	S
I35_RS07675	No orthologue	#N/A	hypothetical protein	74	18	44	0.154167	0.0375	0.0916667	0.0139291	0.00379731	0.0108885	-1.87505	-0.355294	S
I35_RS09735	BCAL2027	#N/A	hypothetical protein	35	11	27	0.166667	0.052381	0.128571	0.0150585	0.00530418	0.0152722	-1.50537	0.0203322	S
I35_RS13530	BCAL0968	#N/A	hypothetical protein	30	8	17	0.153846	0.0410256	0.0871795	0.0139001	0.00415432	0.0103555	-1.74241	-0.4247	S
I35_RS13595	BCAL0955	#N/A	hypothetical protein	99	32	33	0.162562	0.0525452	0.0541872	0.0146876	0.00532081	0.00643655	-1.46488	-1.19023	S
I35_RS15570	BCAL0549	#N/A	TraB family protein	185	53	106	0.161431	0.0462478	0.0924956	0.0145854	0.00468313	0.010987	-1.63898	-0.408733	S
I35_RS15950	BCAL0473	#N/A	7-cyano-7-deazaguanine synthase	138	56	49	0.187755	0.0761905	0.0666667	0.0169638	0.00771517	0.00791891	-1.13669	-1.09909	S
I35_RS15640	BCAL0535	#N/A	histidine kinase	120	15	30	0.147059	0.0183824	0.0367647	0.0132869	0.00186143	0.00436704	-2.83552	-1.60527	T
I35_RS15820	BCAL0499	#N/A	chemotaxis protein CheY	118	11	10	0.217311	0.0202578	0.0184162	0.0196342	0.00205134	0.00218754	-3.25873	-3.16599	T
I35_RS15825	BCAL0497	#N/A	two-component system sensor histidine kinase	525	111	74	0.366876	0.0775681	0.0517121	0.0331475	0.00785467	0.00614255	-2.07728	-2.43199	T
I35_RS16815	BCAM0050	#N/A	universal stress protein A	86	22	38	0.183761	0.0470085	0.0811966	0.0166029	0.00476016	0.00964482	-1.80235	-0.78361	T
I35_RS07080	BCAL1526	#N/A	pilus assembly protein TadE	113	19	30	0.228283	0.0383838	0.0606061	0.0206255	0.00388681	0.00719901	-2.40777	-1.51856	U
I35_RS01065	#N/A	#N/A	tRNA-Ile	29	11	16	0.376623	0.142857	0.207792	0.0340282	0.0144659	0.0246823	-1.23407	-0.463253	#N/A
I35_RS03285	#N/A	#N/A	tRNA-Lys	16	7	5	0.207792	0.0909091	0.0649351	0.0187742	0.0092056	0.00771322	-1.02817	-1.28334	#N/A
I35_RS05470	BCAL1102	#N/A	hypothetical protein	39	7	17	0.152941	0.027451	0.0666667	0.0138183	0.00277973	0.00791891	-2.31357	-0.803212	#N/A
I35_RS06930	BCAL1496	#N/A	hypothetical protein	44	12	29	0.15942	0.0434783	0.105072	0.0144037	0.00440268	0.0124809	-1.70999	-0.206723	#N/A
I35_RS34540	No orthologue	#N/A	hypothetical protein	40	6	22	0.132013	0.019802	0.0726073	0.0119275	0.00200518	0.00862455	-2.57249	-0.467769	#N/A
I35_RS34555	No orthologue	#N/A	hypothetical protein	53	20	31	0.205426	0.0775194	0.120155	0.0185604	0.00784974	0.0142724	-1.24151	-0.378996	#N/A
I35_RS17440	BCAM0174	#N/A	hypothetical protein	27	5	27	0.136364	0.0252525	0.136364	0.0123206	0.00255711	0.0161978	-2.26848	0.394728	#N/A
I35_RS34315	#N/A	#N/A	5S ribosomal RNA	28	9	23	0.247788	0.079646	0.20354	0.0223878	0.00806508	0.0241772	-1.47295	0.110935	#N/A
		Bold= genes in common with anoxic survival in ABC with nitrate

## Sheet: Table S3
									30 potential fitness determinants found for the anoxic survival of B. cenocepacia H111 in ABC with 10 mM NaNO3. Orthologs in B. cenocepacia J3215 are shown. AE = aerobic, AN = anoxia, UIC = unqiue insertion counts, UID = unqiue insertion density, nUID = normalized unqiue insertion density, FC = fold change
Locus_tag	Orthologue	Gene_symbol	Description	UIC_AE	UIC_AN_ABC	UIC_AN_ABC+NO3	UID_AE	UID_AN_ABC	UID_AN_ABC+NO3	nUID_AE	nUID_AN_ABC	nUID_AN_ABC+NO3	FC_AN_ABC	FC_AN_ABC+NO3	COG
I35_RS14435	BCAL0785	#N/A	cytochrome BD oxidase subunit I	589	440	74	0.372549	0.278305	0.0468058	0.0336601	0.0281816	0.00555976	-0.256285	-2.59794	C
I35_RS14440	BCAL0784	#N/A	cytochrome BD oxidase subunit II	491	447	61	0.431838	0.39314	0.05365	0.0390169	0.03981	0.00637274	0.0290312	-2.61411	C
I35_RS02700	BCAL3354	artP	arginine ABC transporter ATP-binding protein	149	36	55	0.205234	0.0495868	0.0757576	0.0185431	0.00502124	0.00899876	-1.88476	-1.04308	E
I35_RS14265	BCAL0820	#N/A	adenine phosphoribosyltransferase	149	33	28	0.262787	0.0582011	0.0493827	0.023743	0.00589353	0.00586586	-2.0103	-2.01709	F
I35_RS03915	BCAL3094	#N/A	coproporphyrinogen III oxidase	257	295	50	0.184626	0.211925	0.0359195	0.0166811	0.0214599	0.00426665	0.363426	-1.96704	H
I35_RS04855	No orthologue	#N/A	nicotinate phosphoribosyltransferase	225	9	33	0.1875	0.0075	0.0275	0.0169408	0.000759462	0.00326655	-4.47938	-2.37466	H
I35_RS01950	BCAL0387	ychF	GTP-binding protein	182	50	55	0.16621	0.0456621	0.0502283	0.0150172	0.00462382	0.0059663	-1.69946	-1.33171	J
I35_RS06995	BCAL1509	truB	tRNA pseudouridine synthase B	151	36	38	0.161844	0.0385852	0.0407288	0.0146227	0.0039072	0.00483792	-1.904	-1.59575	J
I35_RS00660	BCAL0124	#N/A	transcriptional regulator	85	40	22	0.264798	0.124611	0.0685358	0.0239246	0.0126183	0.00814093	-0.922983	-1.55523	K
I35_RS00665	BCAL0125	#N/A	transcriptional regulator	141	52	53	0.254054	0.0936937	0.0954955	0.022954	0.00948758	0.0113433	-1.27463	-1.0169	K
I35_RS00760	BCAL0144	#N/A	DNA-directed RNA polymerase sigma-70 factor	139	38	42	0.189116	0.0517007	0.0571429	0.0170867	0.00523529	0.00678763	-1.70653	-1.3319	K
I35_RS13950	BCAL0883	#N/A	TetR family transcriptional regulator	191	73	53	0.318333	0.121667	0.0883333	0.0287616	0.0123202	0.0104926	-1.22312	-1.45478	K
I35_RS16810	BCAM0049	#N/A	Crp/Fnr family transcriptional regulator	134	48	14	0.179384	0.064257	0.0187416	0.0162075	0.00650677	0.0022262	-1.31665	-2.86401	K
I35_RS28070	BCAM2434	#N/A	YsiA protein	104	13	20	0.143845	0.0179806	0.0276625	0.0129965	0.00182075	0.00328585	-2.83552	-1.98378	K
I35_RS00675	BCAL0127	#N/A	flagellar motor protein MotB	348	62	131	0.341176	0.0607843	0.128431	0.0308255	0.00615512	0.0152555	-2.32427	-1.01479	N
I35_RS15445	BCAL0576	flgK	flagellar hook protein FlgK	537	100	180	0.27795	0.0517598	0.0931677	0.025113	0.00524128	0.0110668	-2.26044	-1.1822	N
I35_RS15470	BCAL0569	flgG	flagellar basal body rod protein FlgG	131	25	39	0.166033	0.0316857	0.0494297	0.0150012	0.00320854	0.00587143	-2.22509	-1.35329	N
I35_RS02230	BCAL3447	#N/A	peptidase A24	282	152	107	0.309211	0.166667	0.117325	0.0279374	0.0168769	0.0139362	-0.727144	-1.00336	O
I35_RS02685	BCAL3358	#N/A	ABC transporter	292	97	102	0.326622	0.108501	0.114094	0.0295105	0.010987	0.0135525	-1.42543	-1.12267	P
I35_RS02485	BCAL3398	#N/A	competence damage-inducible protein A	158	31	47	0.315369	0.0618762	0.0938124	0.0284938	0.00626569	0.0111434	-2.18511	-1.35446	S
I35_RS15950	BCAL0473	#N/A	7-cyano-7-deazaguanine synthase	138	56	49	0.187755	0.0761905	0.0666667	0.0169638	0.00771517	0.00791891	-1.13669	-1.09909	S
I35_RS15820	BCAL0499	#N/A	chemotaxis protein CheY	118	11	10	0.217311	0.0202578	0.0184162	0.0196342	0.00205134	0.00218754	-3.25873	-3.16599	T
I35_RS15825	BCAL0497	#N/A	two-component system sensor histidine kinase	525	111	74	0.366876	0.0775681	0.0517121	0.0331475	0.00785467	0.00614255	-2.07728	-2.43199	T
I35_RS07080	BCAL1526	#N/A	pilus assembly protein TadE	113	19	30	0.228283	0.0383838	0.0606061	0.0206255	0.00388681	0.00719901	-2.40777	-1.51856	U
I35_RS03285	#N/A	#N/A	tRNA-Lys	16	7	5	0.207792	0.0909091	0.0649351	0.0187742	0.0092056	0.00771322	-1.02817	-1.28334	#N/A
I35_RS04255	BCAL3021	#N/A	hypothetical protein	35	44	11	0.194444	0.244444	0.0611111	0.0175682	0.0247528	0.007259	0.494628	-1.27512	#N/A
I35_RS04885	No orthologue	#N/A	membrane protein	52	46	17	0.188406	0.166667	0.0615942	0.0170226	0.0168769	0.00731638	-0.0123984	-1.21825	#N/A
I35_RS10235	#N/A	#N/A	tRNA-Asp	23	15	8	0.298701	0.194805	0.103896	0.0269879	0.0197263	0.0123412	-0.452192	-1.12883	#N/A
I35_RS10250	#N/A	#N/A	tRNA-Glu	12	7	3	0.157895	0.0921053	0.0394737	0.0142659	0.00932673	0.00468883	-0.613128	-1.60527	#N/A
I35_RS14430	BCAL0786	#N/A	membrane protein	146	142	25	0.546816	0.531835	0.093633	0.0494053	0.0538545	0.0111221	0.124402	-2.15124	#N/A
		Bold= genes in common with anoxic survival in ABC
